# Supplementary material for: Long-term effects of competition and environmental drivers on the growth of the endangered coral Mussismilia braziliensis (Verril, 1867)
Source: PeerJ. 2018 Aug 10;6:e5419. doi: 10.7717/peerj.5419 (PMC6089213; doi:10.7717/peerj.5419)
Supplement: Table S2 [file peerj-06-5419-s002.xlsx]

## Sheet: 1
Year	Site	Species	Colony	Total Area (cm²)	Turf (cm)	Cyano (cm)	Macroalgae (cm)	CCA (cm)	Corals (cm)
2006	PLes	M. braziliensis	IB-1	54.457	25.022	0.001	0.001	1.75	2.26
2009	PLes	M. braziliensis	IB-1	41.324	22.116	0.001	0.001	0.001	2.974
2012	PLes	M. braziliensis	IB-1	39.704	12.581	0.001	0.001	1.141	5.64
2013	PLes	M. braziliensis	IB-1	47.983	10.129	0.001	16.384	0.001	0.398
2014	PLes	M. braziliensis	IB-1	43.537	6.626	0.001	10.557	0.768	4.405
2015	PLes	M. braziliensis	IB-1	49.69	14.495	0.001	0.532	2.077	9.155
2016	PLes	M. braziliensis	IB-1	50.499	8.71	0.001	4.301	1.972	8.934
2006	PLes	M. braziliensis	IB-2	35.379	12.608	0.001	8.939	9.708	0.001
2009	PLes	M. braziliensis	IB-2	42.848	24.748	0.001	10.306	0.001	0.001
2012	PLes	M. braziliensis	IB-2	60.374	16.673	0.001	6.545	0.001	0.001
2013	PLes	M. braziliensis	IB-2	54.083	26.275	0.001	11.339	0.001	0.001
2014	PLes	M. braziliensis	IB-2	60.725	32.231	0.001	1.947	0.001	0.001
2015	PLes	M. braziliensis	IB-2	75.416	23.714	0.001	10.426	2.076	0.001
2016	PLes	M. braziliensis	IB-2	86.943	24.78	0.001	11.271	0.466	5.284
2006	PLes	M. braziliensis	IB-3	91.916	13.994	0.001	14.716	10.604	3.28
2009	PLes	M. braziliensis	IB-3	82.471	37.891	0.001	7.297	1.699	6.449
2012	PLes	M. braziliensis	IB-3	96.391	32.993	0.001	13.278	0.519	6.338
2013	PLes	M. braziliensis	IB-3	103.745	17.775	0.001	30.481	0.001	5.017
2014	PLes	M. braziliensis	IB-3	116.963	34.042	0.001	6.421	0.001	11.598
2015	PLes	M. braziliensis	IB-3	112.115	27.313	2.694	6.812	0.001	11.948
2016	PLes	M. braziliensis	IB-3	137.725	20.902	0.001	11.892	0.001	13.497
2006	PLes	M. braziliensis	IB-4	5.789	9.356	0.001	3.479	0.001	0.001
2009	PLes	M. braziliensis	IB-4	3.34	5.772	0.001	0.593	0.001	0.455
2012	PLes	M. braziliensis	IB-4	3.959	6.962	0.001	0.001	0.001	1.033
2013	PLes	M. braziliensis	IB-4	7.454	9.162	0.001	1.598	0.001	0.001
2014	PLes	M. braziliensis	IB-4	3.122	1.786	0.001	6.691	0.001	0.708
2015	PLes	M. braziliensis	IB-4	6.31	4.612	0.001	2.714	0.001	2.161
2016	PLes	M. braziliensis	IB-4	6.809	4.894	0.001	3.231	0.001	0.001
2006	PLes	M. braziliensis	IB-5	9.828	2.299	0.001	10.186	2.846	0.001
2008	PLes	M. braziliensis	IB-5	13.956	6.47	0.001	3.359	7.048	0.001
2009	PLes	M. braziliensis	IB-5	13.625	2.698	0.001	11.091	0.001	0.001
2012	PLes	M. braziliensis	IB-5	27.248	5.037	0.001	15.7	0.001	0.001
2013	PLes	M. braziliensis	IB-5	21.648	10.606	0.001	6.325	0.001	0.964
2014	PLes	M. braziliensis	IB-5	35.914	11.862	0.001	9.367	0.001	1.198
2015	PLes	M. braziliensis	IB-5	40.124	2.794	0.001	20.988	0.001	0.001
2016	PLes	M. braziliensis	IB-5	59.933	7.734	0.001	9.62	4.027	0.001
2006	PLes	M. braziliensis	IB-6	14.258	3.195	0.001	10.663	2.42	0.001
2009	PLes	M. braziliensis	IB-6	10.192	9.399	1.058	0.001	0.001	0.001
2012	PLes	M. braziliensis	IB-6	23.204	7.801	0.001	12.455	0.001	0.001
2013	PLes	M. braziliensis	IB-6	28.133	8.971	0.001	9.233	0.001	0.001
2014	PLes	M. braziliensis	IB-6	29.933	18.636	0.948	4.572	0.001	1.156
2015	PLes	M. braziliensis	IB-6	35.632	20.57	0.358	0.001	0.001	1.883
2016	PLes	M. braziliensis	IB-6	66.716	15.203	0.001	14.803	0.001	2.673
2012	PLes	M. braziliensis	IB-7	0.962	3.349	0.001	0.641	0.001	0.001
2013	PLes	M. braziliensis	IB-7	0.001	0.001	0.001	0.001	0.001	0.001
2014	PLes	M. braziliensis	IB-7	1.86	3.346	0.001	2.211	0.001	0.001
2015	PLes	M. braziliensis	IB-7	2.574	2.25	0.001	4.529	0.001	0.001
2016	PLes	M. braziliensis	IB-7	5.325	6.055	0.325	2.451	0.633	0.001
2012	PLes	M. braziliensis	IB-8	0.172	1.255	0.001	0.568	0.001	0.001
2013	PLes	M. braziliensis	IB-8	0.653	2.148	0.001	0.898	0.001	0.315
2014	PLes	M. braziliensis	IB-8	0.931	2.144	0.001	0.809	0.001	0.848
2015	PLes	M. braziliensis	IB-8	1.233	2.981	0.001	2.131	0.001	0.001
2016	PLes	M. braziliensis	IB-8	1.073	5.312	0.001	0.508	0.001	0.001
2006	PAB	M. braziliensis	EB-1	49.443	22.073	0.001	0.001	9.932	0.001
2008	PAB	M. braziliensis	EB-1	59.603	21.954	0.001	0.001	11.631	0.001
2009	PAB	M. braziliensis	EB-1	51.508	12.236	6.544	0.001	0.001	0.001
2012	PAB	M. braziliensis	EB-1	50.593	23.064	0.001	0.001	10.294	0.001
2013	PAB	M. braziliensis	EB-1	21.432	27.493	8.4	0.001	0.001	0.001
2014	PAB	M. braziliensis	EB-1	0.535	2.353	1.272	0.001	0.001	0.001
2015	PAB	M. braziliensis	EB-1	0.001	0.001	0.001	0.001	0.001	0.001
2016	PAB	M. braziliensis	EB-1	0.001	0.001	0.001	0.001	0.001	0.001
2006	PAB	M. braziliensis	EB-2	110.535	17.351	0.001	0.001	24.642	0.001
2008	PAB	M. braziliensis	EB-2	112.921	22.284	0.001	0.001	18.029	0.001
2009	PAB	M. braziliensis	EB-2	104.513	27.222	9.069	0.001	2.858	0.001
2012	PAB	M. braziliensis	EB-2	119.032	20.457	0.001	0.001	21.184	0.001
2013	PAB	M. braziliensis	EB-2	125.569	27.045	1.707	0.001	10.149	0.001
2014	PAB	M. braziliensis	EB-2	85.244	21.714	24.088	0.001	4.575	0.001
2015	PAB	M. braziliensis	EB-2	90.631	35.508	0.001	0.001	2.478	0.001
2016	PAB	M. braziliensis	EB-2	109.27	21.321	0.001	0.001	17.279	0.001
2006	PAB	M. braziliensis	EB-3	42.112	34.497	10.815	0.001	2.309	0.001
2008	PAB	M. braziliensis	EB-3	27.869	13.387	14.124	1.138	2.072	2.027
2009	PAB	M. braziliensis	EB-3	23.366	13.75	11.858	0.001	0.001	0.001
2012	PAB	M. braziliensis	EB-3	17.709	17.097	2.344	0.001	6.548	0.001
2013	PAB	M. braziliensis	EB-3	12.849	4.787	7.888	0.001	7.002	0.001
2014	PAB	M. braziliensis	EB-3	8.58	9.686	2.973	0.001	3.012	0.001
2015	PAB	M. braziliensis	EB-3	3.57	0.727	3.65	0.001	2.14	0.001
2016	PAB	M. braziliensis	EB-3	0.001	0.001	0.001	0.001	0.001	0.001
2006	PAB	M. braziliensis	EB-4	29.042	15.711	0.001	0.001	4.3	2.584
2008	PAB	M. braziliensis	EB-4	20.901	11.54	4.267	0.001	0.001	2.784
2009	PAB	M. braziliensis	EB-4	19.277	7.649	5.075	0.001	0.001	5.218
2012	PAB	M. braziliensis	EB-4	13.079	11.376	2.714	0.001	0.001	1.719
2013	PAB	M. braziliensis	EB-4	17.481	15.791	0.001	0.001	1.724	4.022
2014	PAB	M. braziliensis	EB-4	14.506	13.368	0.001	0.001	1.979	2.017
2015	PAB	M. braziliensis	EB-4	11.406	8.135	5.397	0.001	0.471	1.971
2016	PAB	M. braziliensis	EB-4	11.197	15.054	0.001	0.001	0.001	0.001
2006	PAB	M. braziliensis	EB-5	21.11	11.286	0.001	0.001	3.049	7.144
2008	PAB	M. braziliensis	EB-5	15.385	4.086	0.001	0.001	6.864	2.401
2009	PAB	M. braziliensis	EB-5	14.825	5.54	0.001	0.001	4.042	0.843
2012	PAB	M. braziliensis	EB-5	17.667	8.076	0.001	0.001	6.409	1.195
2013	PAB	M. braziliensis	EB-5	10.341	15.713	1.49	0.001	5.859	0.001
2014	PAB	M. braziliensis	EB-5	4.885	7.487	0.001	0.001	3.572	0.001
2015	PAB	M. braziliensis	EB-5	3.871	5.255	0.879	0.001	3.551	0.001
2016	PAB	M. braziliensis	EB-5	4.23	4.336	2.886	0.001	1.213	0.001
2006	PAB	M. braziliensis	EB-6	41.468	35.165	6.303	0.001	0.001	0.001
2008	PAB	M. braziliensis	EB-6	34.245	21.374	14.059	0.001	3.799	2.803
2009	PAB	M. braziliensis	EB-6	24.801	10.087	19.688	0.001	2.348	1.119
2012	PAB	M. braziliensis	EB-6	9.175	9.356	3.588	0.001	3.123	0.001
2013	PAB	M. braziliensis	EB-6	11.136	8.673	5.835	0.001	4.231	0.001
2014	PAB	M. braziliensis	EB-6	7.944	12.909	0.709	0.001	2.524	0.001
2015	PAB	M. braziliensis	EB-6	3.455	1.093	3.273	0.001	1.813	0.001
2016	PAB	M. braziliensis	EB-6	0	0.001	0.001	0.001	0.001	0.001
2006	PAB	M. braziliensis	EB-7	55.876	13.823	0.001	0.001	9.585	2.633
2008	PAB	M. braziliensis	EB-7	31.907	11.873	0.001	0.001	8.361	1.827
2009	PAB	M. braziliensis	EB-7	32.25	5.22	0.001	0.001	14.416	2.497
2012	PAB	M. braziliensis	EB-7	27.591	14.681	0.001	0.001	1.995	3.16
2013	PAB	M. braziliensis	EB-7	39.04	11.983	0.001	0.001	5.768	5.814
2014	PAB	M. braziliensis	EB-7	32.316	17.251	0.001	0.001	2.703	1.962
2015	PAB	M. braziliensis	EB-7	16.514	3.349	5.497	0.001	8.181	0.001
2016	PAB	M. braziliensis	EB-7	31.114	13.75	0.001	0.001	9.15	0.001
2006	PAB	M. braziliensis	EB-8	51.857	16.35	0.001	0.001	0.873	3.277
2008	PAB	M. braziliensis	EB-8	27.851	13.741	8.643	0.001	0.001	0.001
2009	PAB	M. braziliensis	EB-8	31.131	19.734	2.781	0.001	0.001	0.001
2012	PAB	M. braziliensis	EB-8	17.665	6.189	11.983	0.001	0.001	0.971
2013	PAB	M. braziliensis	EB-8	59.812	18.291	4.474	0.001	0.001	2.738
2014	PAB	M. braziliensis	EB-8	26.506	9.027	5.624	0.001	2.987	3.993
2015	PAB	M. braziliensis	EB-8	41.219	11.814	14.419	0.001	0.001	6.012
2016	PAB	M. braziliensis	EB-8	32.088	30.848	0.001	0.001	0.001	1.304
